# Supplementary material for: A model study on investigating the sensitivity of aerosol forcing on the volatilities of semi-volatile organic compounds
Source: Copernicus journal article supplement (doi:10.5194/egusphere-2023-2768), 2023-12-06
Supplement: Supplementary file 1 [file egusphere-2023-2768-supplement.pdf]

# A model study on investigating the sensitivity of aerosol forcing on the volatilities of semi-volatile organic compounds

Muhammed Irfan et al.

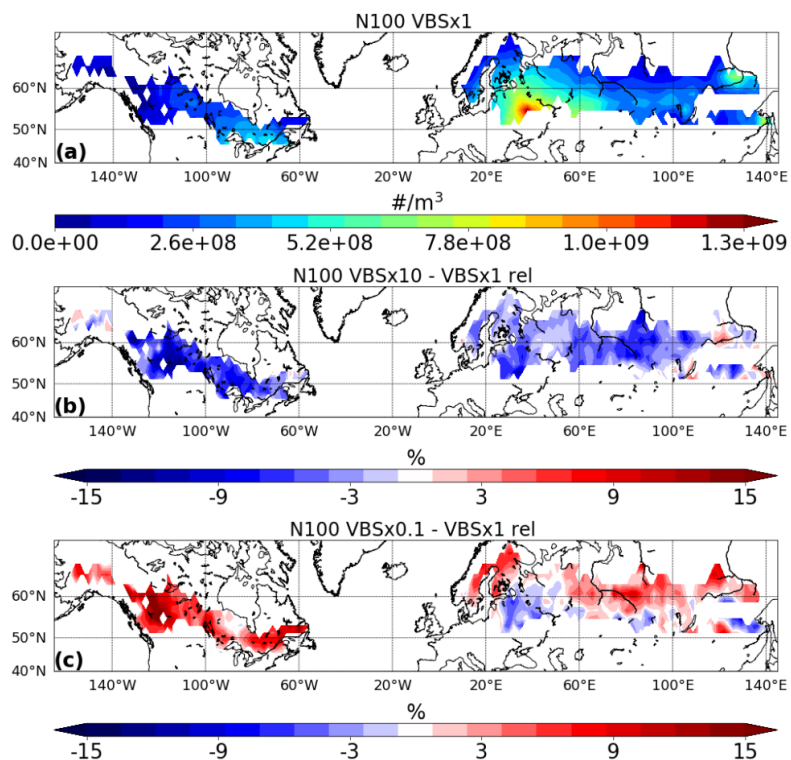

**Figure S1.** Simulated CCN concentration of (a) VBS $\times$ 1 and the relative difference between (b) VBS $\times$ 10 and (c) VBS $\times$ 0.1 with respect VBS $\times$ 1 at 900 hPa

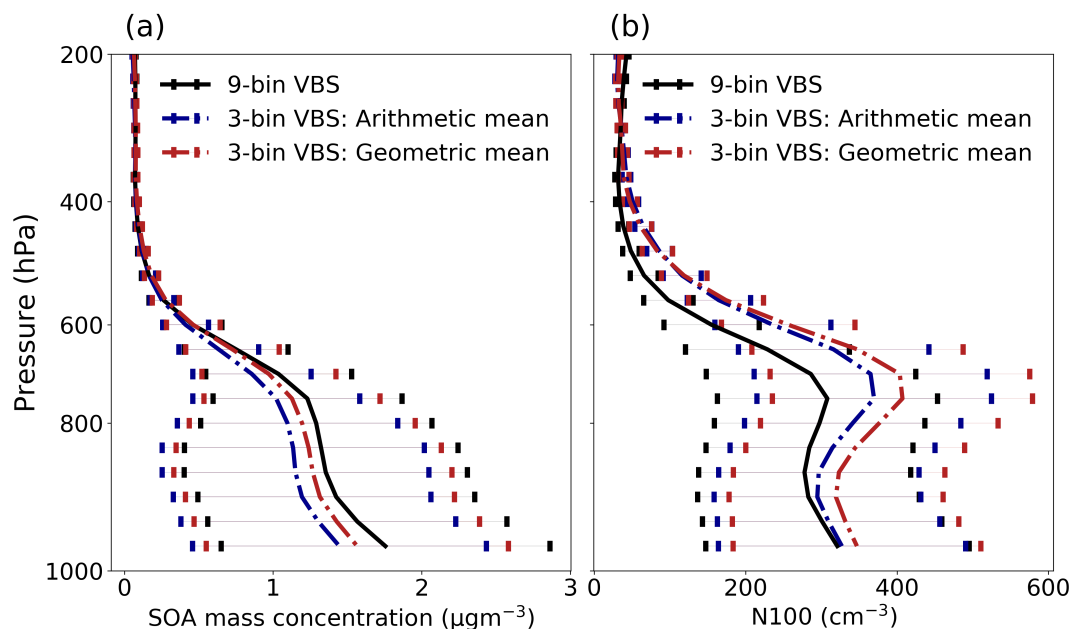

**Figure S2.** Mean vertical profile of (a) N100 and (b) SOA mass concentration for the 9-bin VBS setup, 3-bin VBS setup with volatility calculated using Arithmetic mean, and the 3-bin VBS setup with volatility calculated using Geometric mean. The error bar depicts the one-sigma standard deviation over each model levels.

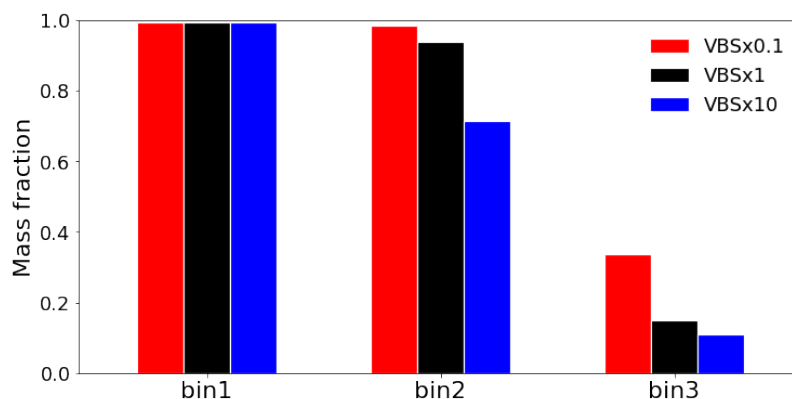

**Figure S3.** Fraction of particle phase mass concentration close to the ground level (particle/(particle+gas)) in each VBS bins with changes in volatility using the 3-bin VBS setup. The x-axis values show the  $C_{sat}$  of that bin in the VBS $\times$ 1 simulation

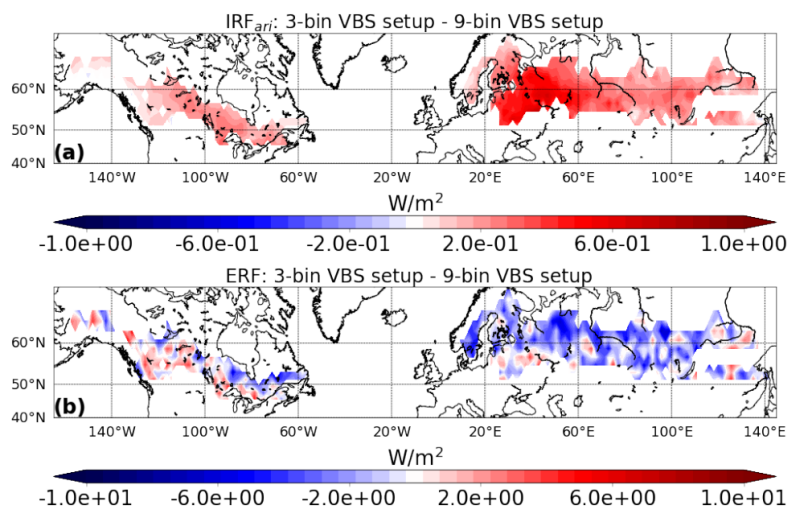

**Figure S4.** (a) TOA IRF<sub>ari</sub>, (b) ERF for the 3-bin VBS setup with respect to 9-bin VBS setup analysed over the boreal region.
